# Supplementary material
Source: ML conference proceedings conference paper supplement (https://proceedings.mlr.press/v119/hamer20a.html)
Supplement: Supplementary file [file hamer20a-supp.pdf]

## A. Proofs for density estimation

### A.1. Proof of Lemma 1

**Lemma 1.** *Let the loss be a Bregman divergence  $B_F$ . Then, for any  $\lambda \in \Lambda \subseteq \Delta_p$ , if  $h^* = \sum_{k=1}^p \lambda_k \mathcal{D}_k$  is in  $\mathcal{H}$ , then it is a minimizer of  $h \mapsto \sum_{k=1}^p \lambda_k B_F(\mathcal{D}_k \parallel h)$ . If  $F$  is further strictly convex, then it is the unique minimizer.*

*Proof.* Fix  $\lambda \in \Lambda$  such that  $\sum_{k=1}^p \lambda_k \mathcal{D}_k$  is in  $\mathcal{H}$ . By the non-negativity of the Bregman divergence, for all  $h$ ,  $B_F(\sum_{k=1}^p \lambda_k \mathcal{D}_k \parallel h) \geq 0$  and equality is achieved for  $h = \sum_{k=1}^p \lambda_k \mathcal{D}_k$ . Thus,  $h^*$  is a minimizer of  $h \mapsto B_F(\sum_{k=1}^p \lambda_k \mathcal{D}_k \parallel h)$ . Since  $F$  is strictly convex,  $h \mapsto B_F(\sum_{k=1}^p \lambda_k \mathcal{D}_k \parallel h)$  is strictly convex and  $h^*$  is therefore the unique minimizer.

Now, for any hypothesis  $h$ , observe that the following difference is a constant independent of  $h$ :

$$\begin{aligned} & \sum_{k=1}^p \lambda_k B_F(\mathcal{D}_k \parallel h) - B_F\left(\sum_{k=1}^p \lambda_k \mathcal{D}_k \parallel h\right) \\ &= \sum_{k=1}^p \lambda_k [F(\mathcal{D}_k) - F(h) - \langle \nabla F(h), \mathcal{D}_k - h \rangle] - \left[ F\left(\sum_{k=1}^p \lambda_k \mathcal{D}_k\right) - F(h) - \left\langle \nabla F(h), \sum_{k=1}^p \lambda_k \mathcal{D}_k - h \right\rangle \right] \\ &= \sum_{k=1}^p \lambda_k F(\mathcal{D}_k) - F\left(\sum_{k=1}^p \lambda_k \mathcal{D}_k\right). \end{aligned} \tag{12}$$

Thus,  $h^*$  is also the unique minimizer of  $h \mapsto \sum_{k=1}^p \lambda_k B_F(\mathcal{D}_k \parallel h)$ .  $\square$

### A.2. Proof of Lemma 2

**Lemma 2.** *Let the loss be a Bregman divergence  $B_F$  with  $F$  strictly convex and assume that  $\text{conv}(\{\mathcal{D}_1, \dots, \mathcal{D}_p\}) \subseteq \mathcal{H}$ . Observe that  $B_F$  is jointly convex in both arguments. Then, for any convex set  $\Lambda \subseteq \Delta_p$ , the solution of the optimization problem  $\min_{h \in \mathcal{H}} \max_{\lambda \in \Lambda} \sum_{k=1}^p \lambda_k B_F(\mathcal{D}_k \parallel h)$  exists and is in  $\text{conv}(\{\mathcal{D}_1, \dots, \mathcal{D}_p\})$ .*

*Proof.* Let  $\mathcal{H}'$  is the closure of convex hull of  $\mathcal{H}$ . Observe that  $\mathcal{H}'$  is a convex and compact set.

$$\min_{h \in \mathcal{H}'} \max_{\lambda \in \Lambda} \sum_{k=1}^p \lambda_k B_F(\mathcal{D}_k \parallel h) \leq \min_{h \in \mathcal{H}} \max_{\lambda \in \Lambda} \sum_{k=1}^p \lambda_k B_F(\mathcal{D}_k \parallel h).$$

We show that minimizer over  $\mathcal{H}'$  exists and is in the  $\text{conv}(\{\mathcal{D}_1, \dots, \mathcal{D}_p\})$ . Since  $\text{conv}(\{\mathcal{D}_1, \dots, \mathcal{D}_p\}) \subseteq \mathcal{H} \subseteq \mathcal{H}'$ , the minimizer over  $\mathcal{H}$  also exists and is in the  $\text{conv}(\{\mathcal{D}_1, \dots, \mathcal{D}_p\})$ .

Since  $B_F$  is convex with respect to its second argument,  $h \mapsto \sum_{k=1}^p \lambda_k B_F(\mathcal{D}_k \parallel h)$  is a convex function of  $h$  defined over the convex set  $\mathcal{H}'$ . Since any maximum of a convex function is also convex,  $h \mapsto \max_{\lambda \in \Lambda} \sum_{k=1}^p \lambda_k B_F(\mathcal{D}_k \parallel h)$  is a convex function and its minimum over the compact set  $\mathcal{H}'$  exists.

We now show that the minimizer is in  $\text{conv}(\{\mathcal{D}_1, \dots, \mathcal{D}_p\})$ . Notice that, since  $\sum_{k=1}^p \lambda_k B_F(\mathcal{D}_k \parallel h)$  is linear in  $\lambda$ , we have

$$\max_{\lambda \in \Lambda} \sum_{k=1}^p \lambda_k B_F(\mathcal{D}_k \parallel h) = \max_{\lambda \in \text{conv}(\Lambda)} \sum_{k=1}^p \lambda_k B_F(\mathcal{D}_k \parallel h).$$

Thus, it suffices to consider the case  $\Lambda \subseteq \Delta_p$ . Then, since  $\mathcal{H}'$  is a compact and convex set and since  $B_F$  is convex with respect to its second argument, by Sion's minimax theorem, we can write:

$$\min_{h \in \mathcal{H}'} \max_{\lambda \in \Lambda} \sum_{k=1}^p \lambda_k B_F(\mathcal{D}_k \parallel h) = \max_{\lambda \in \Lambda} \min_{h \in \mathcal{H}'} \sum_{k=1}^p \lambda_k B_F(\mathcal{D}_k \parallel h).$$

Let  $\lambda^{\text{opt}} = \arg\max_{\lambda \in \Lambda} \min_{h \in \mathcal{H}'} \sum_{k=1}^p \lambda_k B_F(\mathcal{D}_k \parallel h)$  and  $h^* = \sum_{k=1}^p \lambda_k^{\text{opt}} \mathcal{D}_k$ . By assumption,  $\text{conv}(\{\mathcal{D}_1, \dots, \mathcal{D}_p\})$  is included in  $\mathcal{H}'$ , thus  $h^*$  is in  $\mathcal{H}'$  and, by Lemma 1,  $h^*$  is a minimizer of  $h \mapsto \sum_{k=1}^p \lambda_k^{\text{opt}} B_F(\mathcal{D}_k \parallel h)$ . In view of that, if  $h'$

is a minimizer of  $h \mapsto \max_{\lambda \in \Lambda} \sum_{k=1}^p \lambda_k \mathbf{B}_F(\mathcal{D}_k \parallel h)$  over  $\mathcal{H}'$ , then the following holds:

$$\begin{aligned}
 \max_{\lambda} \sum_{k=1}^p \lambda_k \mathbf{B}_F(\mathcal{D}_k \parallel h') &\geq \sum_{k=1}^p \lambda_k^{\text{opt}} \mathbf{B}_F(\mathcal{D}_k \parallel h') && \text{(def. of max)} \\
 &\geq \sum_{k=1}^p \lambda_k^{\text{opt}} \mathbf{B}_F(\mathcal{D}_k \parallel h^*) && \text{(Lemma 1)} \\
 &= \min_{h \in \mathcal{H}'} \sum_{k=1}^p \lambda_k^{\text{opt}} \mathbf{B}_F(\mathcal{D}_k \parallel h) && (h^* \text{ minimizer}) \\
 &= \max_{\lambda \in \Lambda} \min_{h \in \mathcal{H}'} \sum_{k=1}^p \lambda_k \mathbf{B}_F(\mathcal{D}_k \parallel h) && \text{(def. of } \lambda_k^{\text{opt}} \text{)} \\
 &= \min_{h \in \mathcal{H}'} \max_{\lambda \in \Lambda} \sum_{k=1}^p \lambda_k \mathbf{B}_F(\mathcal{D}_k \parallel h). && \text{(Sion's minimax theorem)}
 \end{aligned}$$

By the optimality of  $h'$ , the first and last expressions in this chain of inequalities are equal, which implies the equality of all intermediate terms. In particular, this implies  $\sum_{k=1}^p \lambda_k^{\text{opt}} \mathbf{B}_F(\mathcal{D}_k \parallel h') = \sum_{k=1}^p \lambda_k^{\text{opt}} \mathbf{B}_F(\mathcal{D}_k \parallel h^*)$ . Since  $F$  is strictly convex, by Lemma 1, the minimizer of  $h \mapsto \sum_{k=1}^p \lambda_k^{\text{opt}} \mathbf{B}_F(\mathcal{D}_k \parallel h)$  is unique and  $h' = h^*$ . This completes the proof.  $\square$

## B. Convergence guarantee of FEDBOOST (Theorem 2)

**Theorem 2.** *If Properties 1 hold and  $\eta = \sqrt{\frac{\sigma}{TG^2r\alpha}}$ , then  $\alpha^A$ , the output of FEDBOOST satisfies,*

$$\mathbb{E} [\mathbf{L}(\alpha^A) - \mathbf{L}(\alpha_{\text{opt}})] \leq 2\sqrt{\frac{G^2\sigma r\alpha}{T}} + \frac{\alpha_* M}{2T} \sum_{t=1}^T \sum_{k=1}^q \frac{\alpha_{k,t}^2}{\gamma_{k,t}}.$$

*Proof.* By Jensen's inequality,

$$\mathbf{L}(\alpha^A) \leq \frac{1}{T} \sum_{t=1}^T \mathbf{L}(\alpha_t).$$

Hence, it suffices to bound

$$\frac{1}{T} \sum_{t=1}^T (\mathbf{L}(\alpha_t) - \mathbf{L}(\alpha)).$$

For any  $t$ ,

$$\begin{aligned}
 \mathbf{L}(\alpha_t) - \mathbf{L}(\alpha) &\leq \langle \nabla \mathbf{L}(\alpha_t), \alpha_t - \alpha \rangle && \text{(convexity of L)} \\
 &= \langle \delta_t \mathbf{L}, \alpha_t - \alpha \rangle + \langle \nabla \mathbf{L}(\alpha_t) - \delta_t \mathbf{L}, \alpha_t - \alpha \rangle \\
 &= \frac{1}{\eta} \langle \nabla F(\alpha_t) - \nabla F(v_{t+1}), \alpha_t - \alpha \rangle + \langle \nabla \mathbf{L}(\alpha_t) - \delta_t \mathbf{L}, \alpha_t - \alpha \rangle && \text{(def. of } v_{t+1} \text{)} \\
 &= \frac{1}{\eta} (\mathbf{B}_F(\alpha \parallel \alpha_t) + \mathbf{B}_F(\alpha_t \parallel v_{t+1}) - \mathbf{B}_F(\alpha \parallel v_{t+1})) + \langle \nabla \mathbf{L}(\alpha_t) - \delta_t \mathbf{L}, \alpha_t - \alpha \rangle && \text{(Bregman div. def.)} \\
 &\leq \frac{1}{\eta} (\mathbf{B}_F(\alpha \parallel \alpha_t) + \mathbf{B}_F(\alpha_t \parallel v_{t+1}) - \mathbf{B}_F(\alpha \parallel \alpha_{t+1}) - \mathbf{B}_F(\alpha_{t+1} \parallel v_{t+1})) && \text{(13a)} \\
 &\quad + \langle \nabla \mathbf{L}(\alpha_t) - \delta_t \mathbf{L}, \alpha_t - \alpha \rangle, && \text{(13b)}
 \end{aligned}$$

where the last inequality follows because  $\mathbf{B}_F(\alpha \parallel v_{t+1}) \geq \mathbf{B}_F(\alpha \parallel \alpha_{t+1}) + \mathbf{B}_F(\alpha_{t+1} \parallel v_{t+1})$  by the generalized

Pythagorean inequality. For the first term (13a), summing over  $t$  gives the following telescoping sum,

$$\begin{aligned}
 & \sum_{t=1}^T (\mathbf{B}_F(\alpha \parallel \alpha_t) + \mathbf{B}_F(\alpha_t \parallel v_{t+1}) - \mathbf{B}_F(\alpha \parallel \alpha_{t+1}) - \mathbf{B}_F(\alpha_{t+1} \parallel v_{t+1})) \\
 &= \mathbf{B}_F(\alpha \parallel \alpha_1) - \mathbf{B}_F(\alpha \parallel \alpha_{T+1}) + \sum_{t=1}^T \mathbf{B}_F(\alpha_t \parallel v_{t+1}) - \mathbf{B}_F(\alpha_{t+1} \parallel v_{t+1}) \\
 &\leq \mathbf{B}_F(\alpha \parallel \alpha_1) + \sum_{t=1}^T (\mathbf{B}_F(\alpha_t \parallel v_{t+1}) - \mathbf{B}_F(\alpha_{t+1} \parallel v_{t+1})).
 \end{aligned} \tag{14}$$

Now consider the summation term:

$$\begin{aligned}
 & \mathbf{B}_F(\alpha_t \parallel v_{t+1}) - \mathbf{B}_F(\alpha_{t+1} \parallel v_{t+1}) = F(\alpha_t) - F(\alpha_{t+1}) - \langle \nabla F(v_{t+1}), \alpha_t - \alpha_{t+1} \rangle \\
 &\leq \langle \nabla F(\alpha_t), \alpha_t - \alpha_{t+1} \rangle - \frac{\sigma}{2} \|\alpha_t - \alpha_{t+1}\|^2 - \langle \nabla F(v_{t+1}), \alpha_t - \alpha_{t+1} \rangle \quad (\text{strong convexity of } F) \\
 &= \langle \nabla F(\alpha_t) - \nabla F(v_{t+1}), \alpha_t - \alpha_{t+1} \rangle - \frac{\sigma}{2} \|\alpha_t - \alpha_{t+1}\|^2 \\
 &= \eta \langle \delta_t \mathbf{L}, \alpha_t - \alpha_{t+1} \rangle - \frac{\sigma}{2} \|\alpha_t - \alpha_{t+1}\|^2 \quad (\text{def. of } v_{t+1}) \\
 &\leq \eta \|\delta_t \mathbf{L}\|_* \|\alpha_t - \alpha_{t+1}\| - \frac{\sigma}{2} \|\alpha_t - \alpha_{t+1}\|^2 \quad (\text{Cauchy-Schwarz ineq.}) \\
 &\leq \frac{\eta^2 \|\delta_t \mathbf{L}\|_*^2}{2\sigma}.
 \end{aligned} \tag{15}$$

Combining the above inequalities,

$$\begin{aligned}
 \sum_{t=1}^T (\mathbf{L}(\alpha_t) - \mathbf{L}(\alpha)) &\leq \frac{1}{\eta} \mathbf{B}_F(\alpha \parallel \alpha_1) + \sum_{t=1}^T \left( \frac{\eta \|\delta_t \mathbf{L}\|_*^2}{2\sigma} + \langle \nabla \mathbf{L}(\alpha_t) - \delta_t \mathbf{L}, \alpha_t - \alpha \rangle \right) \\
 &\leq \frac{1}{\eta} \mathbf{B}_F(\alpha \parallel \alpha_1) + \frac{\eta G^2 T}{2\sigma} + \sum_{t=1}^T (\langle \nabla \mathbf{L}(\alpha_t) - \delta_t \mathbf{L}, \alpha_t - \alpha \rangle).
 \end{aligned}$$

We now bound (13b) in expectation, the inner product term in the above equation. Denote by  $\nabla_t \mathbf{L}(\cdot) := \sum_{j \in S_t} \frac{m_j}{m} \nabla \mathbf{L}_j(\cdot)$ , where  $m = \sum_{j \in S_t} m_j$ . Taking the expectation over  $j \in S_t$ ,

$$\begin{aligned}
 \mathbb{E} \left[ \sum_{t=1}^T \langle \nabla \mathbf{L}(\alpha_t) - \delta_t \mathbf{L}, \alpha_t - \alpha \rangle \right] &= \sum_{t=1}^T \langle \nabla \mathbf{L}(\alpha_t) - \mathbb{E}[\delta_t \mathbf{L}], \alpha_t - \alpha \rangle \\
 &= \sum_{t=1}^T \langle \nabla \mathbf{L}(\alpha_t) - \mathbb{E}[\nabla_t \mathbf{L}(\tilde{\alpha}_t)], \alpha_t - \alpha \rangle \\
 &\leq \sum_{t=1}^T \|\nabla \mathbf{L}(\alpha_t) - \mathbb{E}[\nabla_t \mathbf{L}(\tilde{\alpha}_t)]\|_* \|\alpha_t - \alpha\| \quad (\text{Cauchy-Schwarz ineq.}) \\
 &\leq \sum_{t=1}^T \|\nabla \mathbf{L}(\alpha_t) - \mathbb{E}[\nabla_t \mathbf{L}(\tilde{\alpha}_t)]\|_* \alpha_*. \quad (\text{by Prop. 1.2.})
 \end{aligned} \tag{16}$$

To understand  $\mathbb{E}[\nabla_t \mathbf{L}(\tilde{\alpha}_t)]$ , we use Taylor's Theorem in several variables (Folland, 2010). Let  $f = \nabla_t \mathbf{L}$ . Expanding  $f(\tilde{\alpha}_t)$  about  $\alpha_t$ ,

$$f(\tilde{\alpha}_t) - f(\alpha_t) = \nabla f(\alpha_t)(\tilde{\alpha}_t - \alpha_t) + R_1(\tilde{\alpha}_t - \alpha_t),$$

where  $R_1(\cdot)$  is the reminder term that can be bounded as

$$\|R_1(\tilde{\alpha}_t - \alpha_t)\|_* \leq \frac{M}{2!} \|\tilde{\alpha}_t - \alpha_t\|_2^2,$$

with  $\|\nabla^2 f(\cdot)\| \leq M$ . Taking expectation over  $\tilde{\alpha}_t$  and using the fact that  $\mathbb{E}[\tilde{\alpha}_t] = \alpha_t$ , we get

$$\begin{aligned} \|\mathbb{E}[f(\tilde{\alpha}_t)] - f(\alpha_t)\| &\leq \frac{M}{2} \mathbb{E} \|\tilde{\alpha}_t - \alpha_t\|_2^2 \\ &= \frac{M}{2} \sum_{k=1}^q \mathbb{E} \left\| \frac{\alpha_{k,t} \mathbf{1}_{k,t}}{\gamma_{k,t}} - \alpha_{k,t} \right\|_2^2 \\ &= \frac{M}{2} \sum_{k=1}^q \alpha_{k,t}^2 \mathbb{E} \left\| \frac{\mathbf{1}_{k,t}}{\gamma_{k,t}} - 1 \right\|_2^2 \\ &= \frac{M}{2} \sum_{k=1}^q \alpha_{k,t}^2 \left( \frac{1 - \gamma_{k,t}}{\gamma_{k,t}} \right) \\ &\leq \frac{M}{2} \sum_{k=1}^q \frac{\alpha_{k,t}^2}{\gamma_{k,t}}. \end{aligned}$$

Combining the resulting inequalities gives

$$\mathbb{L}(\alpha^A) - \mathbb{L}(\alpha) \leq \frac{1}{\eta T} \mathbb{B}_F(\alpha \parallel \alpha_1) + \frac{\eta G^2}{2\sigma} + \frac{\alpha_* M}{2T} \sum_{t=1}^T \sum_{k=1}^q \frac{\alpha_{k,t}^2}{\gamma_{k,t}}.$$

Choosing the learning rate yields the theorem.  $\square$

### C. Convergence guarantee for AFLBOOST (Theorem 3)

**Theorem 3.** *Let Properties 1 and 2 hold. Let  $\eta_\lambda = \sqrt{\frac{\sigma}{TG_\lambda^2 r_\lambda}}$  and  $\eta_\alpha = \sqrt{\frac{\sigma}{TG_\alpha^2 r_\alpha}}$ . Let  $\alpha^A$  be the output of AFLBOOST. If  $\gamma_{k,t}$  is given by 8, then  $\mathbb{E}[\max_{\lambda \in \Lambda} \mathbb{L}(\alpha^A, \lambda) - \min_{\alpha \in \Delta_q} \max_{\lambda \in \Lambda} \mathbb{L}(\alpha, \lambda)]$  is at most*

$$4\sqrt{\frac{G_\alpha^2(\sigma r_\alpha + \alpha_*)}{T}} + 4\sqrt{\frac{G_\lambda^2(\sigma r_\lambda + \lambda_*)}{T}} + \frac{M(\lambda_* + \alpha_*)}{C}.$$

*Proof.* By Mohri et al. (2019)[Lemma 5], it suffices to bound

$$\frac{1}{T} \max_{\substack{\lambda \in \Lambda; \\ \alpha \in \Delta_q}} \left\{ \sum_{t=1}^T \mathbb{L}(\alpha_t, \lambda) - \mathbb{L}(\alpha, \lambda_t) \right\}. \quad (18)$$

Consider the following inequalities:

$$\begin{aligned} \mathbb{L}(\alpha_t, \lambda) - \mathbb{L}(\alpha, \lambda_t) &= \mathbb{L}(\alpha_t, \lambda) - \mathbb{L}(\alpha_t, \lambda_t) + \mathbb{L}(\alpha_t, \lambda_t) - \mathbb{L}(\alpha, \lambda_t) \\ &\leq \langle \nabla_\lambda \mathbb{L}(\alpha_t, \lambda_t), \lambda - \lambda_t \rangle + \langle \nabla_\alpha \mathbb{L}(\alpha_t, \lambda_t), \alpha_t - \alpha \rangle && \text{(convexity of } \mathbb{L} \text{)} \\ &= \langle \delta_{\lambda,t} \mathbb{L}, \lambda - \lambda_t \rangle + \langle \delta_{\alpha,t} \mathbb{L}, \alpha_t - \alpha \rangle \\ &+ \langle \nabla_\lambda \mathbb{L}(\alpha_t, \lambda_t) - \delta_{\lambda,t} \mathbb{L}, \lambda - \lambda_t \rangle + \langle \nabla_\alpha \mathbb{L}(\alpha_t, \lambda_t) - \delta_{\alpha,t} \mathbb{L}, \alpha_t - \alpha \rangle \end{aligned}$$

Given these inequalities, we can bound (18) using the sub-additive property of max on the previous inequality as follows:

$$\begin{aligned} \max_{\substack{\lambda \in \Lambda; \\ \alpha \in \Delta_q}} \left\{ \sum_{t=1}^T L(\alpha_t, \lambda) - L(\alpha, \lambda_t) \right\} \\ \leq \max_{\substack{\lambda \in \Lambda; \\ \alpha \in \Delta_q}} \sum_{t=1}^T \{ \langle \delta_{\lambda,t} \mathbf{L}, \lambda - \lambda_t \rangle + \langle \delta_{\alpha,t} \mathbf{L}, \alpha_t - \alpha \rangle \} \end{aligned} \quad (19a)$$

$$+ \max_{\substack{\lambda \in \Lambda; \\ \alpha \in \Delta_q}} \sum_{t=1}^T \{ \langle \lambda, \nabla_{\lambda} L(\alpha_t, \lambda_t) - \delta_{\lambda,t} \mathbf{L} \rangle + \langle \alpha, \nabla_{\alpha} L(\alpha_t, \lambda_t) - \delta_{\alpha,t} \mathbf{L} \rangle \} \quad (19b)$$

$$+ \sum_{t=1}^T \langle \lambda_t, \nabla_{\lambda} L(\alpha_t, \lambda_t) - \delta_{\lambda,t} \mathbf{L} \rangle + \langle \alpha_t, \nabla_{\alpha} L(\alpha_t, \lambda_t) - \delta_{\alpha,t} \mathbf{L} \rangle, \quad (19c)$$

which we will bound in three parts. Consider the first sub-equation (19a): similarly in arriving at (13a), it follows by definition of  $w_{t+1}, v_{t+1}$  that

$$\begin{aligned} \langle \delta_{\lambda,t} \mathbf{L}, \lambda - \lambda_t \rangle + \langle \delta_{\alpha,t} \mathbf{L}, \alpha_t - \alpha \rangle &\leq \frac{1}{\eta_{\lambda}} (\mathbf{B}_F(\lambda \parallel \lambda_t) + \mathbf{B}_F(\lambda_t \parallel w_{t+1}) - \mathbf{B}_F(\lambda \parallel \lambda_{t+1}) - \mathbf{B}_F(\lambda_{t+1} \parallel w_{t+1})) \\ &\quad + \frac{1}{\eta_{\alpha}} (\mathbf{B}_F(\alpha \parallel \alpha_t) + \mathbf{B}_F(\alpha_t \parallel v_{t+1}) - \mathbf{B}_F(\alpha \parallel \alpha_{t+1}) - \mathbf{B}_F(\alpha_{t+1} \parallel v_{t+1})). \end{aligned}$$

Summing over  $t$ , this gives the following by similar argument as in (14) for all  $\lambda, \alpha$ :

$$\begin{aligned} \sum_{t=1}^T \langle \delta_{\lambda,t} \mathbf{L}, \lambda - \lambda_t \rangle + \langle \delta_{\alpha,t} \mathbf{L}, \alpha_t - \alpha \rangle &\leq \frac{1}{\eta_{\lambda}} (\mathbf{B}_F(\lambda \parallel \lambda_1) + \sum_{t=1}^T \mathbf{B}_F(\lambda_t \parallel w_{t+1}) - \mathbf{B}_F(\lambda_{t+1} \parallel w_{t+1})) \\ &\quad + \frac{1}{\eta_{\alpha}} (\mathbf{B}_F(\alpha \parallel \alpha_1) + \sum_{t=1}^T \mathbf{B}_F(\alpha_t \parallel v_{t+1}) - \mathbf{B}_F(\alpha_{t+1} \parallel v_{t+1})) \end{aligned}$$

In view of the inequality resulting from (15), for all  $\lambda, \alpha$ , this is bounded by

$$\begin{aligned} \sum_{t=1}^T \langle \delta_{\lambda,t} \mathbf{L}, \lambda - \lambda_t \rangle + \langle \delta_{\alpha,t} \mathbf{L}, \alpha_t - \alpha \rangle &\leq \frac{1}{\eta_{\lambda}} \mathbf{B}_F(\lambda \parallel \lambda_1) + \frac{1}{\eta_{\alpha}} \mathbf{B}_F(\alpha \parallel \alpha_1) + \sum_{t=1}^T \frac{\eta_{\lambda}^2 \|\delta_{\lambda,t} \mathbf{L}\|_*^2 + \eta_{\alpha}^2 \|\delta_{\alpha,t} \mathbf{L}\|_*^2}{2\sigma} \\ &= \frac{1}{\eta_{\lambda}} \mathbf{B}_F(\lambda \parallel \lambda_1) + \frac{1}{\eta_{\alpha}} \mathbf{B}_F(\alpha \parallel \alpha_1) + \frac{T(\eta_{\lambda} G_{\lambda}^2 + \eta_{\alpha} G_{\alpha}^2)}{2\sigma}. \end{aligned}$$

Next, we proceed with the bound for third sub-equation (19c) in expectation via similar argument followed to arrive at (15):

$$\begin{aligned} \mathbb{E} \left[ \sum_{t=1}^T \langle \lambda_t, \nabla_{\lambda} L(\alpha_t, \lambda_t) - \delta_{\lambda,t} \mathbf{L} \rangle + \langle \alpha_t, \nabla_{\alpha} L(\alpha_t, \lambda_t) - \delta_{\alpha,t} \mathbf{L} \rangle \right] \\ = \sum_{t=1}^T \langle \lambda_t, \nabla_{\lambda} L(\alpha_t, \lambda_t) - \mathbb{E}[\nabla_{t,\lambda} L(\tilde{\alpha}_t, \lambda_t)] \rangle + \langle \alpha_t, \nabla_{\alpha} L(\tilde{\alpha}_t, \lambda_t) - \mathbb{E}[\nabla_{t,\alpha} L(\tilde{\alpha}_t, \lambda_t)] \rangle, \end{aligned}$$

where  $\nabla_{t,\lambda} L(\cdot) := \sum_{j \in S_t} \frac{m_j}{m} \nabla_{\lambda} L_j(\cdot)$ , and similarly for  $\nabla_{t,\alpha} L(\cdot)$ . Similar to the proof of (15) and (9), it can be shown that

$$\sum_{t=1}^T \langle \lambda_t, \nabla_{\lambda} L(\alpha_t, \lambda_t) - \mathbb{E}[\nabla_{t,\lambda}] \rangle \leq \frac{MT\lambda_*}{2C}.$$

Similarly,

$$\mathbb{E} \left[ \sum_{t=1}^T \langle \alpha_t, \nabla_{\alpha} L(\alpha_t, \lambda_t) - \delta_{\alpha,t} \mathbf{L} \rangle \right] \leq \frac{MT\alpha_*}{2C}.$$

Combining the two bounds, we have

$$\mathbb{E}\left[\sum_{t=1}^T \langle \lambda_t, \nabla_{\lambda} L(\alpha_t, \lambda_t) - \delta_{\lambda,t} \rangle + \langle \alpha_t, \nabla_{\alpha} L(\alpha_t, \lambda_t) - \delta_{\alpha,t} \rangle\right] \leq \frac{MT(\alpha_* + \lambda_*)}{2C}.$$

We now consider the second sub-equation term (19b), focusing on the first summand with the max over  $\lambda$  and bound this by the Cauchy-Schwarz inequality, then Jensen's inequality:

$$\begin{aligned} & \mathbb{E}\left[\max_{\lambda \in \Lambda} \left\{ \sum_{t=1}^T \langle \lambda, \nabla_{\lambda} L(\alpha_t, \lambda_t) - \delta_{\lambda,t} \rangle \right\}\right] \\ & \leq \mathbb{E}\left[\max_{\lambda \in \Lambda} \left\{ \sum_{t=1}^T \langle \lambda, \nabla_{\lambda} L(\alpha_t, \lambda_t) - \mathbb{E}[\delta_{\lambda,t}] \rangle \right\}\right] + \mathbb{E}\left[\max_{\lambda \in \Lambda} \left\{ \sum_{t=1}^T \langle \lambda, \delta_{\lambda,t} - \mathbb{E}[\delta_{\lambda,t}] \rangle \right\}\right] \\ & \leq \frac{MT\lambda_*}{2C} + \lambda_* G_{\lambda} \sqrt{T}, \end{aligned}$$

where  $\lambda_*$  denotes the max over the compact set  $\Lambda$ . Similarly, we can obtain the following inequality:

$$\mathbb{E}\left[\max_{\alpha \in \Delta_q} \sum_{t=1}^T \langle \alpha, \nabla_{\alpha} L(\alpha_t, \lambda_t) - \delta_{\alpha,t} \rangle\right] \leq \frac{MT\alpha_*}{2C} + \alpha_* G_{\alpha} \sqrt{T}.$$

Thus, combining the inequalities gives

$$\max_{\substack{\lambda \in \Lambda; \\ \alpha \in \Delta_q}} \sum_{t=1}^T \{ \langle \lambda, \nabla_{\lambda} L(\alpha_t, \lambda_t) - \delta_{\lambda,t} \rangle + \langle \alpha, \nabla_{\alpha} L(\alpha_t, \lambda_t) - \delta_{\alpha,t} \rangle \} = \frac{MT(\lambda_* + \alpha_*)}{2C} + \alpha_* G_{\alpha} \sqrt{T} + \lambda_* G_{\lambda} \sqrt{T}.$$

Combining the bounds for (19a), (19b), and (19c), the following bound holds:

$$\begin{aligned} & \frac{1}{T} \sum_{t=1}^T \eta_{\alpha} L(\alpha_t, \lambda) - \eta_{\lambda} L(\alpha, \lambda_t) \\ & \leq \frac{1}{T} \left( \frac{\mathbf{B}_F(\lambda \parallel \lambda_1)}{\eta_{\lambda}} + \frac{\mathbf{B}_F(\alpha \parallel \alpha_1)}{\eta_{\alpha}} \right) + \frac{T(\eta_{\lambda} G_{\lambda}^2 + \eta_{\alpha} G_{\alpha}^2)}{2\sigma} + \frac{M(\lambda_* + \alpha_*)}{C} + \frac{\alpha_* G_{\alpha} + \lambda_* G_{\lambda}}{\sqrt{T}}. \end{aligned}$$

□

## D. Additional density estimation experiments on synthetic data

Continuing the experimental validation of FEDBOOST as described in 5.1, we examine the effect of modulating the communication budget  $C$  on a density estimation task using the same setup as before, but with a power-law distributed synthetic dataset with parameter  $p = 1000$ .

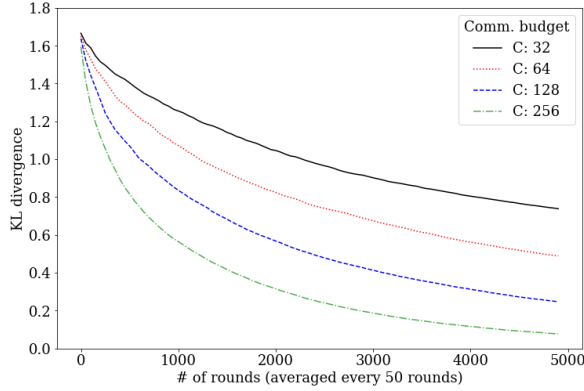

Figure 6. Comparison of loss curves as a function of  $C$  using *uniform sampling* in density estimation on synthetic data.

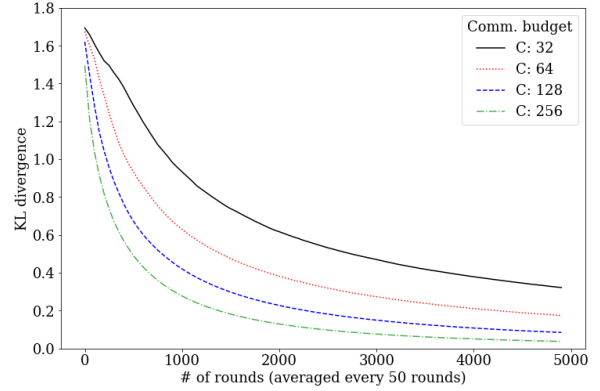

Figure 7. Comparison of convergence as  $C$  varies using *weighted random sampling* for density estimation.

We use a hand-tuned step size  $\eta = 0.001$  for all values of  $C$ , and include  $\ell_1$  regularization in the experiment using *weighted random sampling* (Fig. 7). The experimental setup is otherwise the same for both Fig. 6 and 7. Across all values of  $C$ , *weighted random sampling* of the  $h_k$  achieves lower loss than using *uniform sampling*, which validates that using weighted random sampling reduces the communication-dependent term of FEDBOOST.
